# Supplementary material for: PD-L1 is a critical mediator of regulatory B cells and T cells in invasive breast cancer
Source: PubMed Central journal article supplement (PMC5071845; doi:10.1038/srep35651), 2016-10-20

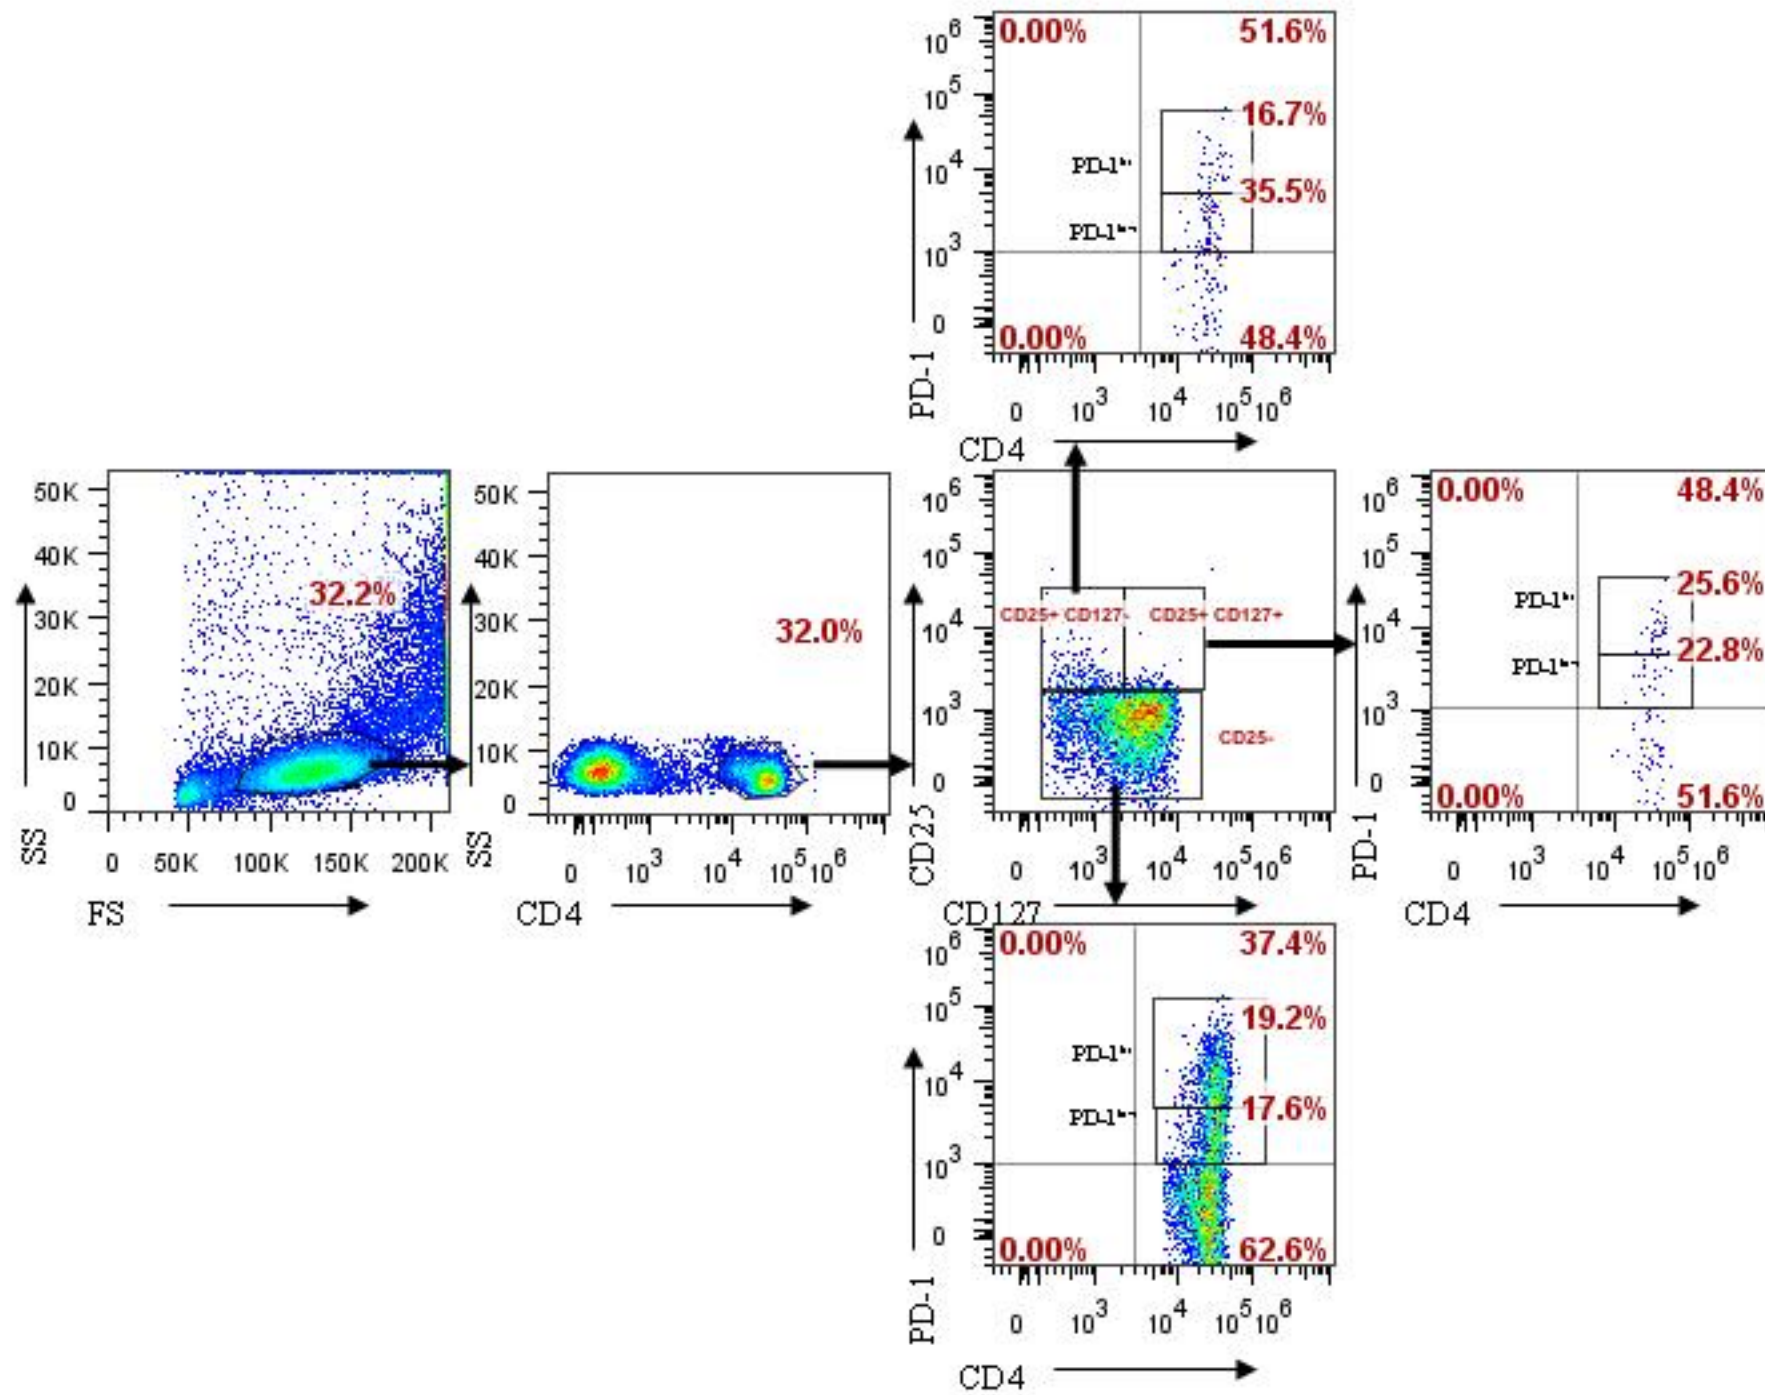

Supplement: srep35651-s2.pdf [file srep35651-s2.pdf]
